# Supplementary material for: Risk Perceptions of Antibiotic Usage and Resistance: A Cross-Sectional Survey of Poultry Farmers in Kwara State, Nigeria
Source: Preprints.org preprint supplement (doi:10.20944/preprints202006.0121.v1), 2020-06-09
Supplement: Supplementary file 3 [file supplementary]

## Sheet: Sheet1
AGE	SEX	OCCUPATN	Level of Education	No of workers	Type of birds	populatn	Vaccination	VACC. By Vet?	Ever collected sample for lab analysis	when last did u use AB?	class of AB?	Did you get prescription from a vet or sought the advice of a vet before usage of any AB?	source of AB?		Do you believe there is excessive AM in poultry?	Do you stop Rx with AB upon improvmnt in r birdds?	Do U purchase AB based on other peoples experience?	Do you purchase or Use AB from your personal previous experience?	Can AB be used to Rx viral, fungal or parsitic infxns?	Do you Observe AB withdrawal peroid?	Do you discard eggs during Withdrawal peroid	Awareness ON AMR	SOURCE OF INFO ON AMR	Can birds be reistance to drugs?	Does AMR makes Rx difficult in birds?	Can AMR in birds affect man?	Can AMR pathgn be transmtd from birds to man?	Can AMR pathgn be transmtd from man to man?	AMR affects ONLY farms dt use AB regularly	AMR is nt a major pblm in Naija?	Can AMR incres worsening of medical condotions?	AB prescptn must be by a vet	Farmers must reduce AB use	Proper poultry vacc will reduce dependence on AB	Farmers needs hand washing to get rid of AMR pathogens	AB should only be prescrbd when needed	I am at risk of AMR pathgn infxn	Govt should support pharm. Companies to develop new drugs	There is nothing I can do to stop AMR spread	AMR is a global health threat							Knowledge score	Knowledge grade	Attitude score
21	M	FARMER	PRI.EDUCATION	4	BROILERS	200	COMPLETE VACC. SCHED.	NO	NO	4 weeks	Quin, Gent.,	YES	OTHER SOURCES		NO	NO	YES	NO	NO	YES	NO	NO		FALSE	NO	NO	YES	YES	TRUE	FALSE	FALSE	5	4	2	5	5	1	2	3	2							2	Unsatisfactory	3
32	F	FARMER	TERTIARY EDUCATION	1	BROILERS	190	COMPLETE VACC. SCHED.	NO	NO	4 weeks	Gent.,	YES	OTHER SOURCES		YES	YES	YES	NO	YES	NO	NO	NO		FALSE	YES	NO	YES	NO	TRUE	TRUE	FALSE	5	4	4	3	5	1	3	3	2							2	Unsatisfactory	1
21	F	FARMER	TERTIARY EDUCATION	1	LAYERS	500	COMPLETE VACC. SCHED.	NO	NO	4 weeks	Gent.,	YES	DRUG PEDDLERS		NO	NO	YES	NO	YES	YES	NO	NO		FALSE	YES	NO	NO	NO	TRUE	TRUE	FALSE	5	4	5	5	5	1	5	3	3							1	Unsatisfactory	3
35	F	FARMER	TERTIARY EDUCATION	1	LAYERS	500	COMPLETE VACC. SCHED.	NO	NO	4 weeks	Tet., Sulpha.,	YES	DRUG PEDDLERS		NO	NO	NO	YES	YES	YES	NO	NO		FALSE	YES	NO	YES	NO	TRUE	TRUE	TRUE	5	4	4	5	5	1	5	3	3							2	Unsatisfactory	3
24	F	FARMER	TERTIARY EDUCATION	5	LAYERS	850	COMPLETE VACC. SCHED.	NO	NO	4 weeks	Tet., Sulpha.,	YES	OTHER SOURCES		NO	NO	NO	NO	NO	YES	NO	NO		FALSE	YES	NO	YES	YES	TRUE	TRUE	TRUE	2	4	3	5	5	1	3	3	3							3	SATISFACTORY	4
36	F	FARMER	TERTIARY EDUCATION	2	LAYERS	444	COMPLETE VACC. SCHED.	NO	NO	4 weeks	Quin, Gent.,	YES	DRUG PEDDLERS		NO	YES	NO	YES	YES	YES	NO	NO		FALSE	YES	NO	NO	NO	TRUE	TRUE	TRUE	2	4	4	5	5	1	3	3	3	For Question 36-44,		5-strongly agree				1	Unsatisfactory	2
26	F	FARMER	TERTIARY EDUCATION	3	LAYERS	250	COMPLETE VACC. SCHED.	NO	NO	4 weeks	Tet., Sulpha.,	YES	DRUG PEDDLERS		NO	YES	NO	NO	YES	YES	NO	NO		FALSE	YES	NO	NO	YES	TRUE	TRUE	TRUE	2	4	3	5	5	1	3	3	3			4- slightly agree				1	Unsatisfactory	3
27	M	OTHER PROFESSION	TERTIARY EDUCATION	2	LAYERS	389	COMPLETE VACC. SCHED.	NO	NO	4 weeks	Gent.,	YES	DRUG PEDDLERS		NO	NO	NO	NO	YES	YES	NO	NO		FALSE	DON’T KNOW	NO	NO	YES	TRUE	TRUE	TRUE	2	4	5	5	5	1	3	3	1			3-neither agree nor disagree				0	Unsatisfactory	4
24	F	FARMER	TERTIARY EDUCATION	5	LAYERS	440	COMPLETE VACC. SCHED.	NO	NO	4 weeks	Tet., Sulpha.,	YES	DRUG PEDDLERS		NO	YES	NO	NO	YES	YES	NO	NO		FALSE	DON’T KNOW	NO	NO	YES	TRUE	TRUE	TRUE	2	4	3	5	5	1	3	3	1			2-slightly disagree				0	Unsatisfactory	3
37	F	OTHER PROFESSION	TERTIARY EDUCATION	4	LAYERS	500	COMPLETE VACC. SCHED.	NO	NO	4 weeks	Quin, Gent.,	YES	DRUG PEDDLERS		NO	NO	YES	NO	NO	YES	NO	NO		FALSE	DON’T KNOW	NO	NO	NO	TRUE	TRUE	TRUE	2	5	4	5	5	1	3	3	1			1-strongly disagree				1	Unsatisfactory	3
35	F	OTHER PROFESSION	TERTIARY EDUCATION	1	LAYERS	500	COMPLETE VACC. SCHED.	NO	NO	4 weeks	Tet., Sulpha.,	YES	LICENSED STORE		NO	YES	YES	YES	YES	NO	NO	NO		FALSE	DON’T KNOW	NO	NO	NO	TRUE	FALSE	TRUE	4	5	3	5	5	1	5	3	1							0	Unsatisfactory	0
28	M	FARMER	TERTIARY EDUCATION	6	LAYERS	450	COMPLETE VACC. SCHED.	NO	NO	4 weeks	Quin, Gent.,	YES	LICENSED STORE		NO	NO	YES	NO	YES	YES	NO	NO		FALSE	DON’T KNOW	NO	NO	NO	TRUE	FALSE	TRUE	4	5	4	5	5	1	5	3	3							0	Unsatisfactory	3
26	F	FARMER	TERTIARY EDUCATION	2	LAYERS	480	COMPLETE VACC. SCHED.	NO	NO	4 weeks	Tet., Sulpha.,	YES	LICENSED STORE		NO	NO	YES	YES	YES	YES	NO	NO		FALSE	DON’T KNOW	NO	YES	NO	TRUE	FALSE	TRUE	4	5	3	5	5	1	5	3	1							1	Unsatisfactory	2
29	F	FARMER	TERTIARY EDUCATION	3	BROILERS	179	COMPLETE VACC. SCHED.	NO	NO	4 weeks	Tet., Sulpha.,	YES	LICENSED STORE		NO	YES	NO	NO	YES	YES	NO	NO		FALSE	DON’T KNOW	NO	YES	NO	TRUE	FALSE	TRUE	4	5	2	5	5	1	5	3	1							1	Unsatisfactory	3
25	F	OTHER PROFESSION	TERTIARY EDUCATION	1	LAYERS	480	COMPLETE VACC. SCHED.	NO	NO	4 weeks	Gent., Tet.,	YES	LICENSED STORE		YES	NO	NO	NO	NO	YES	NO	NO		FALSE	DON’T KNOW	NO	YES	NO	TRUE	FALSE	TRUE	4	5	2	5	5	1	2	3	1							2	Unsatisfactory	4
26	F	OTHER PROFESSION	SECONDARY EDUCATION	4	LAYERS	480	COMPLETE VACC. SCHED.	NO	NO	4 weeks	Tet., Sulpha.,	YES	LICENSED STORE		YES	YES	NO	NO	YES	YES	NO	NO		FALSE	DON’T KNOW	NO	YES	NO	TRUE	FALSE	FALSE	4	5	2	5	5	1	3	5	1							1	Unsatisfactory	3
20	F	FARMER	PRI.EDUCATION	4	LAYERS	470	COMPLETE VACC. SCHED.	NO	NO	4 weeks	Tet., Sulpha.,	YES	LICENSED STORE		YES	NO	YES	NO	YES	YES	NO	NO		FALSE	DON’T KNOW	NO	YES	NO	TRUE	FALSE	FALSE	1	5	2	5	5	1	5	5	1							1	Unsatisfactory	3
27	F	OTHER PROFESSION	SECONDARY EDUCATION	1	LAYERS	350	COMPLETE VACC. SCHED.	NO	NO	4 weeks	Quin, Gent.,	YES	LICENSED STORE		YES	YES	NO	NO	YES	YES	NO	NO		FALSE	DON’T KNOW	NO	YES	YES	TRUE	FALSE	FALSE	1	5	2	5	5	5	5	5	1							1	Unsatisfactory	3
30	M	FARMER	SECONDARY EDUCATION	1	LAYERS	500	COMPLETE VACC. SCHED.	NO	NO	8 weeks	Tet., Sulpha.,	YES	LICENSED STORE		NO	NO	NO	NO	NO	YES	NO	YES	MEDIA	FALSE	DON’T KNOW	NO	YES	NO	TRUE	FALSE	FALSE	1	5	2	5	5	5	3	5	4							2	Unsatisfactory	4
35	F	FARMER	SECONDARY EDUCATION	1	LAYERS	210	COMPLETE VACC. SCHED.	NO	NO	4 weeks	Tet., Sulpha.,	YES	LICENSED STORE		NO	NO	NO	NO	YES	YES	NO	YES	DRUG STORE	FALSE	DON’T KNOW	NO	YES	NO	TRUE	FALSE	TRUE	1	5	5	5	5	5	5	5	4							1	Unsatisfactory	4
26	F	FARMER	SECONDARY EDUCATION	4	LAYERS	400	COMPLETE VACC. SCHED.	NO	NO	4 weeks	Gent., Sulpha.,	YES	LICENSED STORE		NO	YES	NO	YES	YES	YES	NO	YES	MEDIA	FALSE	DON’T KNOW	NO	YES	YES	FALSE	FALSE	TRUE	1	3	5	5	5	5	5	5	4							2	Unsatisfactory	2
27	F	FARMER	SECONDARY EDUCATION	4	LAYERS	500	COMPLETE VACC. SCHED.	NO	NO	4 weeks	Gent., Tet., Sulpha.,	YES	LICENSED STORE		NO	NO	YES	YES	YES	YES	NO	YES	FARMS	FALSE	DON’T KNOW	NO	YES	NO	FALSE	FALSE	TRUE	1	4	5	5	5	5	5	5	4							2	Unsatisfactory	2
27	F	FARMER	SECONDARY EDUCATION	4	LAYERS	500	COMPLETE VACC. SCHED.	NO	NO	4 weeks	Quin, Gent.,	NO	LICENSED STORE		NO	NO	NO	YES	YES	YES	NO	YES	MEDIA	FALSE	DON’T KNOW	NO	NO	NO	FALSE	FALSE	TRUE	1	4	5	5	5	5	5	5	4							1	Unsatisfactory	3
29	F	FARMER	SECONDARY EDUCATION	2	BROILERS	495	COMPLETE VACC. SCHED.	NO	NO	4 weeks	Tet., Sulpha.,	NO	LICENSED STORE		NO	NO	NO	YES	YES	YES	NO	YES	MEDIA	FALSE	DON’T KNOW	NO	NO	NO	FALSE	FALSE	TRUE	1	4	5	5	5	5	5	5	4							1	Unsatisfactory	3
30	F	FARMER	SECONDARY EDUCATION	3	LAYERS	450	COMPLETE VACC. SCHED.	YES	NO	4 weeks	Tet., Sulpha.,	NO	LICENSED STORE		NO	NO	NO	YES	YES	YES	NO	YES	MEDIA	FALSE	DON’T KNOW	NO	NO	YES	FALSE	FALSE	TRUE	4	3	5	5	5	5	5	5	4							1	Unsatisfactory	3
31	F	FARMER	SECONDARY EDUCATION	1	LAYERS	500	COMPLETE VACC. SCHED.	YES	NO	4 weeks	Quin, Gent.,	NO	LICENSED STORE		NO	NO	NO	NO	YES	NO	NO	YES	MEDIA	FALSE	DON’T KNOW	NO	NO	NO	FALSE	FALSE	TRUE	4	3	5	5	3	5	5	5	4							1	Unsatisfactory	3
35	F	OTHER PROFESSION	SECONDARY EDUCATION	3	LAYERS	500	COMPLETE VACC. SCHED.	YES	NO	4 weeks	Tet., Sulpha.,	NO	LICENSED STORE		NO	NO	NO	YES	YES	YES	NO	YES	MEDIA	FALSE	DON’T KNOW	YES	NO	NO	FALSE	FALSE	TRUE	4	3	5	5	3	5	5	5	4							2	Unsatisfactory	3
36	M	FARMER	SECONDARY EDUCATION	3	LAYERS	350	COMPLETE VACC. SCHED.	YES	NO	4 weeks	Tet., Sulpha.,	NO	LICENSED STORE		NO	NO	NO	YES	YES	YES	NO	YES	MEDIA	FALSE	DON’T KNOW	YES	NO	NO	FALSE	FALSE	TRUE	4	3	5	5	3	5	5	5	3							2	Unsatisfactory	3
34	F	FARMER	SECONDARY EDUCATION	6	LAYERS	800	COMPLETE VACC. SCHED.	YES	NO	8 weeks	Gent., Sulpha.,	NO	LICENSED STORE		NO	NO	NO	NO	YES	NO	NO	YES	MEDIA	FALSE	DON’T KNOW	YES	NO	NO	FALSE	FALSE	TRUE	4	3	5	5	3	1	3	5	3							2	Unsatisfactory	3
39	F	FARMER	TERTIARY EDUCATION	6	LAYERS	450	COMPLETE VACC. SCHED.	NO	NO	4 weeks	Quin, Gent.,	NO	LICENSED STORE		NO	NO	NO	NO	YES	YES	NO	YES	MEDIA	FALSE	DON’T KNOW	YES	NO	NO	FALSE	FALSE	TRUE	4	3	5	5	3	1	5	5	3							2	Unsatisfactory	4
36	F	OTHER PROFESSION	TERTIARY EDUCATION	5	LAYERS	500	COMPLETE VACC. SCHED.	NO	NO	4 weeks	Quin, Gent.,	NO	LICENSED STORE		NO	NO	NO	YES	YES	YES	NO	YES	MEDIA	FALSE	DON’T KNOW	YES	NO	NO	FALSE	FALSE	TRUE	4	3	5	5	3	1	5	5	3							2	Unsatisfactory	3
34	F	FARMER	TERTIARY EDUCATION	1	LAYERS	500	COMPLETE VACC. SCHED.	NO	NO	4 weeks	Quin, Gent.,	NO	LICENSED STORE		NO	NO	NO	NO	NO	YES	NO	YES	MEDIA	FALSE	DON’T KNOW	YES	NO	NO	FALSE	TRUE	TRUE	4	3	5	5	3	1	5	5	3							3	SATISFACTORY	4
34	F	FARMER	TERTIARY EDUCATION	2	LAYERS	300	COMPLETE VACC. SCHED.	NO	NO	4 weeks	Tet., Sulpha.,	NO	LICENSED STORE		NO	NO	NO	NO	YES	YES	NO	YES	FARMS	FALSE	DON’T KNOW	YES	NO	NO	FALSE	TRUE	TRUE	4	4	5	3	3	1	5	5	3							2	Unsatisfactory	4
21	F	FARMER	PRI.EDUCATION	3	LAYERS	800	INCOMPLETE VACC.	NO	NO	4 weeks	Quin, Gent.,	NO	LICENSED STORE		NO	YES	NO	NO	YES	YES	NO	YES	MEDIA	FALSE	DON’T KNOW	YES	NO	NO	FALSE	FALSE	TRUE	5	4	5	5	3	1	5	5	3							2	Unsatisfactory	3
29	M	OTHER PROFESSION	TERTIARY EDUCATION	4	LAYERS	500	COMPLETE VACC. SCHED.	NO	NO	4 weeks	Quin, Gent.,	NO	LICENSED STORE		NO	NO	NO	NO	NO	YES	NO	YES	MEDIA	FALSE	YES	YES	NO	NO	TRUE	FALSE	TRUE	4	4	5	5	3	1	5	5	3							3	SATISFACTORY	4
26	M	FARMER	SECONDARY EDUCATION	6	BROILERS	900	COMPLETE VACC. SCHED.	NO	NO	4 weeks	Quin, Gent.,	NO	LICENSED STORE		NO	NO	NO	NO	NO	YES	NO	YES	MEDIA	TRUE	YES	YES	NO	NO	TRUE	FALSE	TRUE	4	4	5	5	3	1	5	2	3							4	SATISFACTORY	4
26	M	FARMER	SECONDARY EDUCATION	2	LAYERS	500	INCOMPLETE VACC.	YES	NO	4 weeks	Gent.,	NO	LICENSED STORE		NO	NO	NO	NO	YES	YES	NO	YES	MEDIA	TRUE	YES	YES	NO	NO	FALSE	FALSE	TRUE	4	4	5	5	5	1	5	2	3							4	SATISFACTORY	4
24	F	OTHER PROFESSION	SECONDARY EDUCATION	2	LAYERS	450	INCOMPLETE VACC.	YES	NO	4 weeks	Gent.,	NO	LICENSED STORE		NO	NO	YES	NO	YES	YES	NO	YES	MEDIA	TRUE	YES	YES	NO	NO	FALSE	FALSE	TRUE	4	4	5	5	5	1	5	2	3							4	SATISFACTORY	3
32	F	FARMER	SECONDARY EDUCATION	1	LAYERS	440	COMPLETE VACC. SCHED.	YES	NO	4 weeks	Gent.,	NO	LICENSED STORE		YES	YES	NO	NO	YES	YES	NO	YES	MEDIA	TRUE	YES	YES	YES	NO	FALSE	FALSE	TRUE	4	4	5	5	5	1	5	2	3							5	SATISFACTORY	3
20	F	OTHER PROFESSION	SECONDARY EDUCATION	6	LAYERS	550	COMPLETE VACC. SCHED.	YES	NO	4 weeks	Quin, Gent.,	NO	LICENSED STORE		YES	NO	NO	YES	YES	YES	NO	YES	MEDIA	TRUE	YES	YES	YES	NO	FALSE	FALSE	TRUE	4	4	5	5	5	1	5	2	3							5	SATISFACTORY	3
34	F	FARMER	SECONDARY EDUCATION	3	LAYERS	470	COMPLETE VACC. SCHED.	YES	NO	4 weeks	Sulpha., Gent.,	NO	LICENSED STORE		NO	NO	NO	YES	YES	NO	NO	YES	DRUG STORE	TRUE	YES	YES	YES	NO	FALSE	FALSE	TRUE	4	4	5	5	5	1	5	2	3							5	SATISFACTORY	2
24	F	OTHER PROFESSION	SECONDARY EDUCATION	2	LAYERS	470	COMPLETE VACC. SCHED.	YES	NO	4 weeks	Gent.,	NO	LICENSED STORE		NO	YES	NO	YES	YES	YES	NO	YES	DRUG STORE	TRUE	YES	YES	YES	NO	TRUE	TRUE	TRUE	4	1	5	5	1	1	5	2	3							4	SATISFACTORY	2
25	F	OTHER PROFESSION	SECONDARY EDUCATION	2	COCKREL	200	COMPLETE VACC. SCHED.	NO	NO	4 weeks	Gent., Tet.,	NO	LICENSED STORE		YES	NO	NO	YES	NO	YES	NO	YES	DRUG STORE	TRUE	YES	NO	YES	NO	TRUE	TRUE	TRUE	1	1	5	5	1	1	5	5	3							4	SATISFACTORY	3
24	F	OTHER PROFESSION	SECONDARY EDUCATION	1	LAYERS	999	COMPLETE VACC. SCHED.	NO	NO	4 weeks	Gent., Tet.,	NO	LICENSED STORE		YES	NO	YES	YES	YES	YES	NO	YES	MEDIA	TRUE	YES	YES	YES	NO	TRUE	FALSE	TRUE	1	1	5	3	1	1	5	5	3							4	SATISFACTORY	2
41	F	FARMER	TERTIARY EDUCATION	1	LAYERS	450	COMPLETE VACC. SCHED.	NO	NO	8 weeks	Gent.,	NO	LICENSED STORE		NO	YES	NO	YES	YES	YES	NO	YES	MEDIA	TRUE	YES	NO	YES	NO	TRUE	FALSE	TRUE	1	1	5	5	1	1	5	5	3							3	SATISFACTORY	2
49	M	OTHER PROFESSION	SECONDARY EDUCATION	2	LAYERS	450	COMPLETE VACC. SCHED.	NO	NO	8 weeks	Gent., Sulpha.	NO	LICENSED STORE		NO	NO	NO	YES	YES	YES	NO	YES	MEDIA	TRUE	YES	YES	YES	NO	TRUE	FALSE	TRUE	1	1	5	5	1	1	5	5	3							4	SATISFACTORY	3
56	F	OTHER PROFESSION	SECONDARY EDUCATION	1	LAYERS	800	COMPLETE VACC. SCHED.	NO	NO	4 weeks	Gent., Sulpha.,	NO	LICENSED STORE		YES	NO	NO	YES	YES	YES	NO	YES	MEDIA	TRUE	YES	NO	YES	NO	TRUE	FALSE	TRUE	1	1	5	5	1	1	5	5	3							3	SATISFACTORY	3
57	F	FARMER	SECONDARY EDUCATION	1	LAYERS	350	COMPLETE VACC. SCHED.	NO	NO	4 weeks	Gent.,	NO	LICENSED STORE		NO	YES	NO	YES	NO	YES	NO	YES	MEDIA	TRUE	YES	YES	YES	NO	TRUE	FALSE	TRUE	1	1	5	5	1	1	5	5	3							5	SATISFACTORY	2
51	F	OTHER PROFESSION	SECONDARY EDUCATION	2	LAYERS	400	COMPLETE VACC. SCHED.	NO	NO	4 weeks	Tet.,	NO	LICENSED STORE		YES	NO	NO	YES	NO	NO	NO	YES	MEDIA	TRUE	DON’T KNOW	NO	NO	NO	TRUE	FALSE	TRUE	1	1	5	5	1	1	5	5	3							2	Unsatisfactory	2
58	F	FARMER	SECONDARY EDUCATION	2	LAYERS	450	COMPLETE VACC. SCHED.	NO	NO	4 weeks	Quin, Gent.,	NO	LICENSED STORE		NO	NO	NO	YES	YES	YES	NO	YES	FARMS	TRUE	DON’T KNOW	YES	NO	NO	TRUE	FALSE	TRUE	1	1	5	5	1	1	5	5	3							2	Unsatisfactory	3
51	F	OTHER PROFESSION	SECONDARY EDUCATION	3	LAYERS	400	COMPLETE VACC. SCHED.	NO	NO	8 weeks	Quin, Gent.,	NO	LICENSED STORE		YES	YES	YES	YES	YES	YES	NO	YES	MEDIA	TRUE	DON’T KNOW	NO	NO	NO	TRUE	FALSE	TRUE	1	1	5	5	1	1	5	5	1							1	Unsatisfactory	1
46	F	FARMER	SECONDARY EDUCATION	1	LAYERS	400	COMPLETE VACC. SCHED.	NO	NO	4 weeks	Quin, Gent.,	NO	LICENSED STORE		NO	NO	NO	YES	YES	YES	NO	YES	MEDIA	TRUE	DON’T KNOW	YES	NO	YES	TRUE	TRUE	TRUE	2	1	5	5	5	1	5	5	3							2	Unsatisfactory	3
49	F	FARMER	SECONDARY EDUCATION	2	LAYERS	450	COMPLETE VACC. SCHED.	NO	NO	4 weeks	Quin, Gent.,	NO	LICENSED STORE		YES	YES	NO	NO	YES	YES	NO	YES	MEDIA	TRUE	DON’T KNOW	NO	NO	YES	TRUE	TRUE	TRUE	3	1	5	5	1	1	5	5	3							1	Unsatisfactory	3
48	F	FARMER	SECONDARY EDUCATION	3	LAYERS	850	COMPLETE VACC. SCHED.	NO	NO	4 weeks	Quin, Gent.,	NO	LICENSED STORE		YES	NO	NO	NO	YES	YES	NO	YES	MEDIA	TRUE	DON’T KNOW	YES	NO	YES	TRUE	TRUE	TRUE	4	1	5	5	1	1	5	5	3							2	Unsatisfactory	4
49	M	FARMER	SECONDARY EDUCATION	3	LAYERS	999	COMPLETE VACC. SCHED.	NO	NO	4 weeks	Tet., Gent.,	NO	LICENSED STORE		NO	YES	NO	NO	NO	YES	NO	YES	MEDIA	TRUE	DON’T KNOW	YES	NO	YES	FALSE	FALSE	TRUE	4	1	5	5	1	1	5	5	3							4	SATISFACTORY	3
42	F	FARMER	TERTIARY EDUCATION	3	LAYERS	600	COMPLETE VACC. SCHED.	NO	NO	4 weeks	Gent., Tet., Sulpha.,	NO	LICENSED STORE		YES	NO	NO	NO	NO	YES	NO	YES	MEDIA	TRUE	DON’T KNOW	NO	NO	YES	FALSE	FALSE	TRUE	4	1	5	3	1	5	5	3	1							3	SATISFACTORY	4
57	F	OTHER PROFESSION	TERTIARY EDUCATION	2	BROILERS	440	COMPLETE VACC. SCHED.	NO	NO	4 weeks	Tet., Sulpha.,	NO	LICENSED STORE		NO	YES	NO	NO	NO	YES	NO	YES	MEDIA	TRUE	YES	YES	NO	YES	FALSE	FALSE	TRUE	4	1	5	3	1	5	5	3	1							5	SATISFACTORY	3
54	F	FARMER	TERTIARY EDUCATION	1	LAYERS	600	COMPLETE VACC. SCHED.	NO	NO	4 weeks	Quin, Gent.,	NO	LICENSED STORE		NO	NO	NO	NO	NO	YES	NO	YES	MEDIA	TRUE	YES	YES	NO	YES	FALSE	FALSE	TRUE	4	1	5	3	1	5	5	3	1							5	SATISFACTORY	4
56	F	FARMER	TERTIARY EDUCATION	3	BROILERS	750	COMPLETE VACC. SCHED.	NO	NO	8 weeks	Tet., Gent.,	NO	LICENSED STORE		NO	YES	NO	NO	NO	NO	NO	YES	DRUG STORE	TRUE	YES	NO	YES	YES	FALSE	FALSE	TRUE	4	1	5	3	1	5	5	3	1							5	SATISFACTORY	2
54	F	OTHER PROFESSION	TERTIARY EDUCATION	2	LAYERS	2500	COMPLETE VACC. SCHED.	NO	NO	4 weeks	Gent., Sulpha.,	YES	LICENSED STORE		NO	NO	NO	NO	NO	YES	NO	YES	DRUG STORE	TRUE	YES	NO	YES	YES	FALSE	FALSE	TRUE	4	1	5	3	1	5	5	3	3							5	SATISFACTORY	4
46	M	OTHER PROFESSION	TERTIARY EDUCATION	2	LAYERS	850	COMPLETE VACC. SCHED.	NO	NO	4 weeks	Tet., Sulpha.,	YES	LICENSED STORE		NO	YES	NO	NO	NO	NO	NO	YES	DRUG STORE	TRUE	YES	YES	YES	YES	FALSE	FALSE	TRUE	5	1	5	3	1	5	5	5	3							6	SATISFACTORY	2
46	M	FARMER	TERTIARY EDUCATION	3	LAYERS	800	COMPLETE VACC. SCHED.	NO	NO	4 weeks	Quin, Gent.,	YES	LICENSED STORE		NO	YES	NO	NO	NO	YES	NO	YES	MEDIA	TRUE	DON’T KNOW	YES	YES	YES	FALSE	FALSE	TRUE	5	1	5	3	1	5	5	5	3							5	SATISFACTORY	3
45	M	FARMER	TERTIARY EDUCATION	1	LAYERS	800	COMPLETE VACC. SCHED.	NO	NO	4 weeks	Tet.,	YES	LICENSED STORE		NO	NO	NO	NO	NO	YES	NO	YES	MEDIA	TRUE	DON’T KNOW	YES	YES	YES	FALSE	FALSE	TRUE	5	1	5	3	1	5	5	5	3							5	SATISFACTORY	4
48	M	FARMER	TERTIARY EDUCATION	6	LAYERS	600	COMPLETE VACC. SCHED.	NO	NO	4 weeks	Quin, Gent.,	YES	LICENSED STORE		NO	NO	YES	YES	NO	YES	NO	YES	MEDIA	TRUE	YES	YES	YES	YES	FALSE	TRUE	TRUE	5	1	5	3	1	5	5	5	3							6	SATISFACTORY	2
46	M	FARMER	TERTIARY EDUCATION	7	LAYERS	600	COMPLETE VACC. SCHED.	NO	NO	8 weeks	Tet., Gent.,	YES	LICENSED STORE		NO	YES	YES	YES	NO	YES	NO	YES	MEDIA	TRUE	YES	YES	YES	YES	FALSE	TRUE	TRUE	5	1	5	3	1	5	5	3	3							6	SATISFACTORY	1
54	M	OTHER PROFESSION	TERTIARY EDUCATION	2	LAYERS	650	COMPLETE VACC. SCHED.	NO	NO	4 weeks	Gent., Sulpha.,	YES	LICENSED STORE		NO	YES	NO	YES	NO	YES	NO	YES	MEDIA	TRUE	DON’T KNOW	YES	YES	YES	FALSE	FALSE	TRUE	5	1	5	3	1	5	5	3	3							5	SATISFACTORY	2
58	M	OTHER PROFESSION	TERTIARY EDUCATION	6	LAYERS	750	COMPLETE VACC. SCHED.	NO	NO	4 weeks	Tet.,	YES	LICENSED STORE		NO	NO	NO	YES	NO	YES	NO	YES	VET	TRUE	YES	YES	YES	YES	FALSE	FALSE	TRUE	5	1	5	3	1	5	5	5	3							6	SATISFACTORY	3
49	F	FARMER	TERTIARY EDUCATION	1	LAYERS	470	COMPLETE VACC. SCHED.	NO	NO	4 weeks	Quin, Gent.,	YES	LICENSED STORE		NO	NO	NO	YES	NO	YES	NO	YES	VET	TRUE	YES	YES	YES	YES	FALSE	FALSE	TRUE	5	1	5	3	1	5	5	5	5							6	SATISFACTORY	3
42	F	OTHER PROFESSION	TERTIARY EDUCATION	6	LAYERS	890	COMPLETE VACC. SCHED.	NO	NO	4 weeks	Gent., Sulpha.,	YES	LICENSED STORE		NO	YES	YES	YES	NO	YES	NO	YES	FARMS	TRUE	DON’T KNOW	YES	NO	YES	FALSE	FALSE	TRUE	5	1	5	3	5	5	5	4	5							4	SATISFACTORY	1
49	F	OTHER PROFESSION	TERTIARY EDUCATION	1	LAYERS	900	COMPLETE VACC. SCHED.	NO	NO	4 weeks	Gent.,	YES	LICENSED STORE		NO	YES	NO	YES	NO	YES	NO	YES	VET	TRUE	DON’T KNOW	NO	NO	YES	FALSE	FALSE	TRUE	5	1	5	3	5	1	5	4	5							3	SATISFACTORY	2
40	M	OTHER PROFESSION	TERTIARY EDUCATION	2	LAYERS	400	COMPLETE VACC. SCHED.	NO	NO	4 weeks	Gent., Tet.,	YES	LICENSED STORE		NO	NO	NO	YES	NO	YES	NO	YES	DRUG STORE	TRUE	DON’T KNOW	NO	NO	YES	FALSE	FALSE	TRUE	3	1	5	3	5	1	5	4	5							3	SATISFACTORY	3
40	M	FARMER	TERTIARY EDUCATION	4	LAYERS	999	COMPLETE VACC. SCHED.	NO	NO	4 weeks	Quin, Gent.,	YES	LICENSED STORE		NO	NO	NO	YES	NO	YES	NO	YES	DRUG STORE	TRUE	DON’T KNOW	NO	NO	YES	FALSE	FALSE	TRUE	3	1	5	3	5	1	5	4	5							3	SATISFACTORY	3
40	M	OTHER PROFESSION	TERTIARY EDUCATION	7	LAYERS	999	COMPLETE VACC. SCHED.	NO	NO	8 weeks	Tet., Sulpha.,	YES	LICENSED STORE		NO	NO	NO	YES	NO	YES	NO	YES	DRUG STORE	TRUE	YES	NO	NO	YES	FALSE	FALSE	TRUE	3	1	1	3	5	1	5	4	5							4	SATISFACTORY	3
54	M	FARMER	TERTIARY EDUCATION	2	LAYERS	999	COMPLETE VACC. SCHED.	NO	NO	8 weeks	Gent., Sulpha.,	YES	LICENSED STORE		NO	YES	YES	YES	NO	YES	NO	YES	DRUG STORE	TRUE	YES	NO	NO	YES	FALSE	FALSE	TRUE	3	1	1	3	5	1	5	4	5							4	SATISFACTORY	1
52	M	OTHER PROFESSION	TERTIARY EDUCATION	1	LAYERS	999	COMPLETE VACC. SCHED.	NO	NO	4 weeks	Gent.,	YES	LICENSED STORE		NO	YES	YES	YES	NO	YES	NO	YES	DRUG STORE	TRUE	YES	NO	NO	YES	FALSE	FALSE	TRUE	3	1	1	3	5	1	5	4	5							4	SATISFACTORY	1
51	F	OTHER PROFESSION	TERTIARY EDUCATION	5	LAYERS	999	COMPLETE VACC. SCHED.	NO	NO	4 weeks	Gent., Sulpha.,	YES	LICENSED STORE		NO	YES	YES	YES	NO	YES	NO	YES	DRUG STORE	TRUE	YES	NO	NO	YES	FALSE	FALSE	TRUE	3	1	1	5	5	1	5	4	5							4	SATISFACTORY	1
58	F	FARMER	TERTIARY EDUCATION	6	LAYERS	999	COMPLETE VACC. SCHED.	NO	NO	4 weeks	Tet.,	YES	LICENSED STORE		NO	NO	NO	YES	NO	YES	NO	YES	DRUG STORE	TRUE	YES	NO	NO	YES	FALSE	FALSE	TRUE	3	1	1	5	5	1	5	4	5							4	SATISFACTORY	3
53	M	FARMER	TERTIARY EDUCATION	7	LAYERS	999	COMPLETE VACC. SCHED.	NO	NO	4 weeks	Gent., Sulpha.,	YES	LICENSED STORE		NO	NO	NO	YES	NO	YES	NO	YES	VET	TRUE	YES	NO	NO	YES	FALSE	FALSE	TRUE	3	1	1	5	5	1	5	4	3							4	SATISFACTORY	3
59	M	FARMER	TERTIARY EDUCATION	5	LAYERS	2700	COMPLETE VACC. SCHED.	NO	NO	4 weeks	Gent.,	YES	LICENSED STORE		NO	NO	NO	YES	NO	YES	NO	YES	VET	TRUE	YES	NO	NO	YES	FALSE	FALSE	TRUE	3	1	1	5	5	1	5	4	3							4	SATISFACTORY	3
57	M	FARMER	TERTIARY EDUCATION	2	LAYERS	999	COMPLETE VACC. SCHED.	NO	NO	8 weeks	Gent., Sulpha.,	YES	LICENSED STORE		NO	YES	YES	YES	NO	YES	NO	YES	VET	TRUE	YES	NO	NO	YES	FALSE	FALSE	TRUE	3	1	1	5	5	1	5	4	5							4	SATISFACTORY	1
52	M	FARMER	TERTIARY EDUCATION	1	LAYERS	3500	COMPLETE VACC. SCHED.	NO	NO	4 weeks	Tet.,	YES	LICENSED STORE		NO	YES	YES	YES	NO	NO	NO	NO		TRUE	YES	NO	NO	YES	FALSE	FALSE	TRUE	4	1	1	5	5	1	5	4	5							4	SATISFACTORY	0
58	M	FARMER	TERTIARY EDUCATION	3	LAYERS	999	COMPLETE VACC. SCHED.	NO	NO	4 weeks	Gent., Sulpha.,	YES	LICENSED STORE		NO	YES	YES	NO	NO	YES	NO	NO		TRUE	YES	NO	NO	YES	FALSE	FALSE	TRUE	4	1	1	5	5	1	5	4	5							4	SATISFACTORY	2
52	M	FARMER	TERTIARY EDUCATION	1	LAYERS	500	COMPLETE VACC. SCHED.	NO	YES	4 weeks	Quin, Gent.,	YES	LICENSED STORE		NO	NO	YES	NO	NO	YES	NO	NO		TRUE	YES	NO	NO	YES	FALSE	FALSE	TRUE	4	1	1	5	5	1	5	4	5							4	SATISFACTORY	3
52	M	FARMER	TERTIARY EDUCATION	3	LAYERS	2500	COMPLETE VACC. SCHED.	NO	NO	4 weeks	Tet.,	YES	LICENSED STORE		NO	NO	YES	NO	NO	YES	NO	NO		TRUE	DON’T KNOW	NO	YES	YES	FALSE	FALSE	TRUE	4	1	1	5	5	1	5	4	5							4	SATISFACTORY	3
42	M	FARMER	TERTIARY EDUCATION	2	LAYERS	700	COMPLETE VACC. SCHED.	NO	NO	8 weeks	Gent., Sulpha.,	YES	LICENSED STORE		NO	NO	NO	NO+W89	NO	YES	NO	NO		TRUE	DON’T KNOW	YES	YES	YES	FALSE	FALSE	TRUE	4	1	1	5	5	1	5	4	5							5	SATISFACTORY	3
40	F	FARMER	TERTIARY EDUCATION	6	LAYERS	550	INCOMPLETE VACC.	NO	NO	4 weeks	Sulpha.,	YES	LICENSED STORE		NO	NO	NO	NO	NO	YES	NO	NO		TRUE	YES	NO	YES	YES	FALSE	FALSE	TRUE	4	1	1	5	5	1	5	3	5							5	SATISFACTORY	4
46	M	FARMER	TERTIARY EDUCATION	6	LAYERS	650	COMPLETE VACC. SCHED.	NO	NO	8 weeks	Quin, Gent.,	YES	LICENSED STORE		NO	NO	NO	YES	NO	YES	NO	NO		TRUE	YES	NO	YES	YES	FALSE	FALSE	TRUE	4	1	1	5	5	1	5	3	5							5	SATISFACTORY	3
41	M	OTHER PROFESSION	TERTIARY EDUCATION	3	LAYERS	600	COMPLETE VACC. SCHED.	NO	NO	4 weeks	Quin, Gent.,	YES	LICENSED STORE		NO	YES	NO	YES	NO	YES	NO	NO		TRUE	DON’T KNOW	NO	YES	YES	FALSE	FALSE	TRUE	5	1	1	5	5	1	5	3	5							4	SATISFACTORY	2
48	M	OTHER PROFESSION	TERTIARY EDUCATION	4	LAYERS	900	COMPLETE VACC. SCHED.	NO	NO	4 weeks	Sulpha.,	YES	LICENSED STORE		NO	NO	NO	YES	NO	YES	NO	NO		TRUE	YES	NO	YES	YES	FALSE	FALSE	TRUE	5	1	1	5	5	1	5	3	3							5	SATISFACTORY	3
42	M	OTHER PROFESSION	TERTIARY EDUCATION	1	LAYERS	999	COMPLETE VACC. SCHED.	NO	NO	4 weeks	Gent., Tet.,	YES	LICENSED STORE		NO	NO	NO	YES	NO	YES	NO	NO		TRUE	YES	NO	YES	YES	FALSE	FALSE	TRUE	5	1	1	5	5	1	5	3	3							5	SATISFACTORY	3
48	F	FARMER	TERTIARY EDUCATION	1	LAYERS	999	COMPLETE VACC. SCHED.	NO	NO	4 weeks	Gent.,	NO	LICENSED STORE		NO	NO	NO	YES	NO	YES	NO	NO		TRUE	YES	NO	YES	NO	FALSE	FALSE	TRUE	3	1	1	5	5	1	5	3	3							5	SATISFACTORY	3
42	M	OTHER PROFESSION	TERTIARY EDUCATION	2	LAYERS	3300	COMPLETE VACC. SCHED.	NO	NO	4 weeks	Gent., Sulpha.,	NO	LICENSED STORE		NO	YES	NO	YES	NO	YES	NO	NO		TRUE	YES	NO	YES	NO	FALSE	FALSE	TRUE	4	1	1	5	5	1	5	3	3							5	SATISFACTORY	2
43	M	OTHER PROFESSION	TERTIARY EDUCATION	1	LAYERS	800	COMPLETE VACC. SCHED.	NO	NO	4 weeks	Gent.,	NO	LICENSED STORE		NO	YES	NO	YES	NO	YES	NO	NO		TRUE	YES	NO	YES	NO	FALSE	FALSE	TRUE	3	1	1	5	5	1	5	3	3							5	SATISFACTORY	2
47	M	OTHER PROFESSION	TERTIARY EDUCATION	1	LAYERS	800	COMPLETE VACC. SCHED.	NO	NO	4 weeks	Tet., Sulpha.,	NO	LICENSED STORE		NO	YES	NO	NO	NO	YES	NO	NO		TRUE	YES	NO	YES	NO	FALSE	FALSE	TRUE	2	1	1	5	5	2	5	3	3							5	SATISFACTORY	3
49	M	FARMER	TERTIARY EDUCATION	1	LAYERS	999	COMPLETE VACC. SCHED.	NO	NO	4 weeks	Tet., Sulpha.,	NO	LICENSED STORE		NO	YES	NO	NO	NO	YES	NO	NO		TRUE	YES	NO	NO	NO	FALSE	FALSE	FALSE	4	1	1	5	5	2	5	3	3							4	SATISFACTORY	3
45	F	FARMER	TERTIARY EDUCATION	2	BROILERS	400	COMPLETE VACC. SCHED.	NO	NO	4 weeks	Sulpha.	NO	LICENSED STORE		NO	NO	NO	NO	NO	YES	NO	NO		TRUE	DON’T KNOW	NO	NO	NO	FALSE	FALSE	FALSE	2	1	1	5	2	1	5	3	5							3	SATISFACTORY	4
54	F	OTHER PROFESSION	TERTIARY EDUCATION	2	LAYERS	900	COMPLETE VACC. SCHED.	NO	NO	4 weeks	Quin, Gent.,	NO	LICENSED STORE		NO	YES	NO	YES	NO	YES	NO	NO		TRUE	DON’T KNOW	NO	NO	NO	FALSE	FALSE	FALSE	2	1	1	5	5	1	5	3	5							3	SATISFACTORY	2
59	F	OTHER PROFESSION	TERTIARY EDUCATION	2	LAYERS	900	COMPLETE VACC. SCHED.	NO	NO	4 weeks	Quin, Gent.,	NO	LICENSED STORE		NO	NO	NO	YES	NO	YES	NO	NO		TRUE	DON’T KNOW	NO	NO	NO	FALSE	FALSE	FALSE	2	1	1	5	5	1	5	3	5							3	SATISFACTORY	3
56	M	FARMER	TERTIARY EDUCATION	2	LAYERS	1000	COMPLETE VACC. SCHED.	NO	NO	4 weeks	Quin, Gent.,	NO	LICENSED STORE		NO	YES	NO	YES	NO	YES	NO	NO		TRUE	DON’T KNOW	NO	NO	NO	FALSE	FALSE	FALSE	2	1	1	5	2	1	5	3	5							3	SATISFACTORY	2
54	M	OTHER PROFESSION	TERTIARY EDUCATION	6	LAYERS	980	INCOMPLETE VACC.	NO	NO	8 weeks	Sulpha.,	NO	LICENSED STORE		NO	NO	NO	NO	NO	YES	NO	NO		TRUE	DON’T KNOW	NO	NO	NO	FALSE	FALSE	TRUE	3	1	1	5	2	1	5	3	5							3	SATISFACTORY	4
45	M	FARMER	TERTIARY EDUCATION	4	LAYERS	3000	COMPLETE VACC. SCHED.	NO	NO	4 weeks	Quin, Gent.,	NO	LICENSED STORE		NO	NO	NO	NO	NO	YES	NO	YES	VET	TRUE	DON’T KNOW	NO	NO	NO	FALSE	FALSE	TRUE	3	1	1	5	2	1	5	3	5							3	SATISFACTORY	4
51	M	OTHER PROFESSION	TERTIARY EDUCATION	9	LAYERS	2500	COMPLETE VACC. SCHED.	NO	NO	4 weeks	Gent.,	NO	LICENSED STORE		NO	NO	NO	NO	NO	YES	NO	YES	VET	TRUE	DON’T KNOW	NO	NO	NO	FALSE	FALSE	TRUE	3	1	2	5	2	1	5	3	5							3	SATISFACTORY	4
52	M	FARMER	TERTIARY EDUCATION	9	LAYERS	5000	COMPLETE VACC. SCHED.	NO	NO	4 weeks	Quin, Gent.,	NO	LICENSED STORE		NO	NO	NO	YES	NO	YES	NO	YES	VET	TRUE	DON’T KNOW	NO	NO	NO	FALSE	FALSE	TRUE	3	1	2	5	2	1	5	3	5							3	SATISFACTORY	3
54	M	FARMER	TERTIARY EDUCATION	1	LAYERS	800	COMPLETE VACC. SCHED.	NO	NO	4 weeks	Sulpha.	NO	LICENSED STORE		NO	NO	NO	YES	NO	YES	NO	YES	VET	TRUE	DON’T KNOW	NO	NO	NO	FALSE	FALSE	TRUE	3	1	2	5	3	1	5	3	3							3	SATISFACTORY	3
45	F	FARMER	TERTIARY EDUCATION	1	LAYERS	990	COMPLETE VACC. SCHED.	NO	NO	4 weeks	Gent., Tet.,	NO	LICENSED STORE		NO	NO	NO	YES	NO	YES	NO	YES	VET	TRUE	DON’T KNOW	NO	NO	NO	FALSE	FALSE	TRUE	3	1	2	5	3	1	5	3	3							3	SATISFACTORY	3
40	F	FARMER	TERTIARY EDUCATION	1	BROILERS	520	COMPLETE VACC. SCHED.	NO	NO	8 weeks	Sulpha.	NO	LICENSED STORE		NO	NO	NO	YES	NO	YES	NO	YES	VET	TRUE	DON’T KNOW	NO	NO	NO	FALSE	FALSE	TRUE	3	2	2	5	3	1	5	3	3							3	SATISFACTORY	3
40	M	FARMER	TERTIARY EDUCATION	2	LAYERS	500	COMPLETE VACC. SCHED.	NO	NO	8 weeks	Quin, Gent.,	NO	LICENSED STORE		NO	NO	NO	YES	NO	YES	NO	YES	VET	TRUE	DON’T KNOW	NO	NO	YES	FALSE	FALSE	TRUE	3	2	2	5	3	1	5	3	3							3	SATISFACTORY	3
41	F	OTHER PROFESSION	TERTIARY EDUCATION	5	BROILERS	600	COMPLETE VACC. SCHED.	NO	NO	8 weeks	Sulpha., Tet.,	NO	LICENSED STORE		NO	NO	NO	NO	NO	YES	NO	YES	VET	TRUE	DON’T KNOW	NO	NO	YES	FALSE	FALSE	TRUE	3	2	2	5	3	1	5	3	3							3	SATISFACTORY	4
47	F	FARMER	TERTIARY EDUCATION	2	LAYERS	509	COMPLETE VACC. SCHED.	YES	NO	8 weeks	Sulpha.	NO	LICENSED STORE		NO	NO	NO	NO	NO	NO	NO	YES	VET	TRUE	DON’T KNOW	NO	NO	YES	FALSE	FALSE	TRUE	3	2	2	5	3	1	5	3	3							3	SATISFACTORY	3
43	F	OTHER PROFESSION	TERTIARY EDUCATION	5	LAYERS	600	COMPLETE VACC. SCHED.	YES	NO	4 weeks	Quin, Gent.,	NO	LICENSED STORE		NO	YES	NO	YES	NO	YES	NO	YES	VET	TRUE	DON’T KNOW	NO	NO	YES	FALSE	FALSE	FALSE	3	2	2	5	3	1	5	3	3							3	SATISFACTORY	2
47	M	OTHER PROFESSION	TERTIARY EDUCATION	4	LAYERS	1000	COMPLETE VACC. SCHED.	YES	NO	4 weeks	Sulpha.	NO	LICENSED STORE		NO	YES	NO	YES	NO	YES	NO	YES	VET	TRUE	DON’T KNOW	YES	NO	YES	FALSE	FALSE	FALSE	3	2	2	5	3	1	5	3	3							4	SATISFACTORY	2
43	F	FARMER	TERTIARY EDUCATION	6	LAYERS	2500	INCOMPLETE VACC.	YES	NO	4 weeks	Sulpha., Gent.,	NO	LICENSED STORE		NO	YES	NO	YES	NO	YES	NO	YES	VET	TRUE	DON’T KNOW	YES	NO	YES	FALSE	FALSE	FALSE	4	2	2	5	3	1	5	3	3							4	SATISFACTORY	2
60	M	FARMER	TERTIARY EDUCATION	3	LAYERS	900	COMPLETE VACC. SCHED.	YES	NO	4 weeks	Sulpha.	NO	LICENSED STORE		NO	YES	NO	YES	NO	YES	NO	YES	VET	TRUE	NO	YES	NO	YES	FALSE	FALSE	FALSE	3	2	2	5	3	1	5	3	3							4	SATISFACTORY	2
65	F	OTHER PROFESSION	TERTIARY EDUCATION	2	LAYERS	988	COMPLETE VACC. SCHED.	YES	NO	4 weeks	Quin, Gent.,	NO	LICENSED STORE		NO	NO	NO	YES	NO	YES	NO	YES	VET	TRUE	NO	YES	NO	YES	FALSE	FALSE	TRUE	3	2	2	5	3	2	5	3	3							4	SATISFACTORY	3
64	M	FARMER	TERTIARY EDUCATION	4	LAYERS	550	COMPLETE VACC. SCHED.	YES	NO	4 weeks	Sulpha.	YES	LICENSED STORE		NO	YES	YES	YES	NO	YES	NO	YES	VET	TRUE	NO	NO	NO	YES	FALSE	FALSE	TRUE	3	2	2	5	3	2	5	3	3							3	SATISFACTORY	1
61	F	FARMER	TERTIARY EDUCATION	6	BROILERS	2000	COMPLETE VACC. SCHED.	NO	NO	4 weeks	Gent., Sulpha.	YES	LICENSED STORE		NO	NO	NO	YES	NO	YES	NO	YES	VET	TRUE	NO	NO	NO	YES	FALSE	FALSE	TRUE	3	2	2	5	4	2	5	3	3							3	SATISFACTORY	3
62	M	FARMER	TERTIARY EDUCATION	5	LAYERS	2200	COMPLETE VACC. SCHED.	NO	NO	4 weeks	Sulpha.	YES	LICENSED STORE		NO	YES	NO	YES	NO	YES	NO	YES	VET	TRUE	NO	NO	NO	YES	FALSE	FALSE	TRUE	2	2	2	5	4	2	5	3	3							3	SATISFACTORY	2
62	F	OTHER PROFESSION	TERTIARY EDUCATION	3	LAYERS	750	COMPLETE VACC. SCHED.	YES	NO	4 weeks	Quin, Gent.,	YES	LICENSED STORE		NO	NO	NO	NO	NO	NO	NO	YES	VET	TRUE	NO	NO	NO	YES	FALSE	FALSE	TRUE	2	2	2	5	4	2	5	3	3							3	SATISFACTORY	3
64	M	FARMER	TERTIARY EDUCATION	5	LAYERS	750	COMPLETE VACC. SCHED.	YES	NO	4 weeks	Gent., Sulpha.	NO	LICENSED STORE		NO	NO	NO	NO	NO	NO	NO	YES	VET	TRUE	NO	NO	NO	YES	FALSE	FALSE	TRUE	2	2	2	5	4	1	3	3	3							3	SATISFACTORY	3
63	M	OTHER PROFESSION	TERTIARY EDUCATION	3	LAYERS	1000	COMPLETE VACC. SCHED.	YES	NO	4 weeks	Gent., Sulpha.	YES	LICENSED STORE		NO	NO	NO	YES	NO	YES	NO	YES	VET	TRUE	NO	NO	NO	YES	FALSE	FALSE	TRUE	2	2	2	5	4	1	3	3	3							3	SATISFACTORY	3
68	F	FARMER	TERTIARY EDUCATION	7	LAYERS	1000	COMPLETE VACC. SCHED.	NO	NO	4 weeks	Gent., Sulpha.	YES	LICENSED STORE		NO	NO	NO	YES	NO	YES	NO	YES	VET	TRUE	NO	NO	NO	YES	FALSE	FALSE	TRUE	2	2	2	5	4	1	3	3	3							3	SATISFACTORY	3
62	M	OTHER PROFESSION	TERTIARY EDUCATION	2	LAYERS	900	COMPLETE VACC. SCHED.	NO	NO	8 weeks	Quin, Gent.,	YES	LICENSED STORE		NO	YES	NO	YES	NO	YES	NO	YES	VET	TRUE	NO	NO	NO	YES	FALSE	FALSE	TRUE	2	2	2	5	4	1	3	3	3							3	SATISFACTORY	2
60	F	FARMER	TERTIARY EDUCATION	2	BROILERS	550	COMPLETE VACC. SCHED.	NO	NO	8 weeks	Quin, Gent.,	YES	LICENSED STORE		NO	YES	NO	YES	NO	YES	NO	YES	FARMS	TRUE	NO	NO	NO	YES	FALSE	FALSE	FALSE	2	2	2	5	4	1	3	3	3							3	SATISFACTORY	2
61	M	FARMER	TERTIARY EDUCATION	3	LAYERS	2000	COMPLETE VACC. SCHED.	NO	NO	8 weeks	Gent., Tet.,	NO	LICENSED STORE		NO	YES	NO	NO	NO	YES	NO	YES	VET	TRUE	NO	NO	NO	YES	FALSE	FALSE	FALSE	2	2	2	5	4	1	3	3	3							3	SATISFACTORY	3
61	M	FARMER	TERTIARY EDUCATION	2	COCKREL	670	COMPLETE VACC. SCHED.	NO	NO	8 weeks	Gent.,	NO	LICENSED STORE		NO	YES	NO	NO	NO	NO	NO	YES	FARMS	TRUE	NO	NO	NO	YES	FALSE	FALSE	FALSE	5	2	2	5	4	5	5	3	3							3	SATISFACTORY	2
																																															3.16		2.752
[truncated: 8 more columns]

## Sheet: Sheet2
Populatn of birds		Category
200		<500		100	<500
190		<500		200	<500
500		500 - 1000		300	<500
500		500 - 1000		400	<500
850		500 - 1000		500	500 - 1000
444		<500		600	500 - 1000
250		<500		700	500 - 1000
389		<500		800	500 - 1000
440		<500		900	500 - 1000
500		500 - 1000		1000	>1000
500		500 - 1000		2000	>1000
450		<500		3000	>1000
480		<500		4000	>1000
179		<500		5000	>1000
480		<500
480		<500
470		<500
350		<500
500		500 - 1000
210		<500
400		<500
500		500 - 1000
500		500 - 1000
495		<500
450		<500
500		500 - 1000
500		500 - 1000
350		<500
800		500 - 1000
450		<500
500		500 - 1000
500		500 - 1000
300		<500
800		500 - 1000
500		500 - 1000
900		500 - 1000
500		500 - 1000
450		<500
440		<500
550		500 - 1000
470		<500
470		<500
200		<500
999		500 - 1000
450		<500
450		<500
800		500 - 1000
350		<500
400		<500
450		<500
400		<500
400		<500
450		<500
850		500 - 1000
999		500 - 1000
600		500 - 1000
440		<500
600		500 - 1000
750		500 - 1000
2500		>1000
850		500 - 1000
800		500 - 1000
800		500 - 1000
600		500 - 1000
600		500 - 1000
650		500 - 1000
750		500 - 1000
470		<500
890		500 - 1000
900		500 - 1000
400		<500
999		500 - 1000
999		500 - 1000
999		500 - 1000
999		500 - 1000
999		500 - 1000
999		500 - 1000
999		500 - 1000
2700		>1000
999		500 - 1000
3500		>1000
999		500 - 1000
500		500 - 1000
2500		>1000
700		500 - 1000
550		500 - 1000
650		500 - 1000
600		500 - 1000
900		500 - 1000
999		500 - 1000
999		500 - 1000
3300		>1000
800		500 - 1000
800		500 - 1000
999		500 - 1000
400		<500
900		500 - 1000
900		500 - 1000
1000		>1000
980		500 - 1000
3000		>1000
2500		>1000
5000		>1000
800		500 - 1000
990		500 - 1000
520		500 - 1000
500		500 - 1000
600		500 - 1000
509		500 - 1000
600		500 - 1000
1000		>1000
2500		>1000
900		500 - 1000
988		500 - 1000
550		500 - 1000
2000		>1000
2200		>1000
750		500 - 1000
750		500 - 1000
1000		>1000
1000		>1000
900		500 - 1000
550		500 - 1000
2000		>1000
670		500 - 1000

## Sheet: Knowledge score
Can AB be used to Rx viral, fungal or parsitic infxns?	Can birds be reistance to drugs?	Does AMR makes Rx difficult in birds?	Can AMR pathogens in birds affect man?	Can AMR pathgn be transmtd from birds to man?	Can AMR pathgn be transmtd from man to man?	Does AMR affects ONLY farms dt use AB regularly		Knowledge score		Knowledge grade
1	0	0	0	1	YES	0		2		Unsatisfactory
0	0	1	0	1	NO	0		2		Unsatisfactory
0	0	1	0	0	NO	0		1		Unsatisfactory
0	0	1	0	1	NO	0		2		Unsatisfactory
1	0	1	0	1	YES	0		3		SATISFACTORY
0	0	1	0	0	NO	0		1		Unsatisfactory
0	0	1	0	0	YES	0		1		Unsatisfactory
0	0	0	0	0	YES	0		0		Unsatisfactory
0	0	0	0	0	YES	0		0		Unsatisfactory
1	0	0	0	0	NO	0		1		Unsatisfactory
0	0	0	0	0	NO	0		0		Unsatisfactory
0	0	0	0	0	NO	0		0		Unsatisfactory
0	0	0	0	1	NO	0		1		Unsatisfactory
0	0	0	0	1	NO	0		1		Unsatisfactory
1	0	0	0	1	NO	0		2		Unsatisfactory
0	0	0	0	1	NO	0		1		Unsatisfactory
0	0	0	0	1	NO	0		1		Unsatisfactory
0	0	0	0	1	YES	0		1		Unsatisfactory
1	0	0	0	1	NO	0		2		Unsatisfactory
0	0	0	0	1	NO	0		1		Unsatisfactory
0	0	0	0	1	YES	1		2		Unsatisfactory
0	0	0	0	1	NO	1		2		Unsatisfactory
0	0	0	0	0	NO	1		1		Unsatisfactory
0	0	0	0	0	NO	1		1		Unsatisfactory
0	0	0	0	0	YES	1		1		Unsatisfactory
0	0	0	0	0	NO	1		1		Unsatisfactory
0	0	0	1	0	NO	1		2		Unsatisfactory
0	0	0	1	0	NO	1		2		Unsatisfactory
0	0	0	1	0	NO	1		2		Unsatisfactory
0	0	0	1	0	NO	1		2		Unsatisfactory
0	0	0	1	0	NO	1		2		Unsatisfactory
1	0	0	1	0	NO	1		3		SATISFACTORY
0	0	0	1	0	NO	1		2		Unsatisfactory
0	0	0	1	0	NO	1		2		Unsatisfactory
1	0	1	1	0	NO	0		3		SATISFACTORY
1	1	1	1	0	NO	0		4		SATISFACTORY
0	1	1	1	0	NO	1		4		SATISFACTORY
0	1	1	1	0	NO	1		4		SATISFACTORY
0	1	1	1	1	NO	1		5		SATISFACTORY
0	1	1	1	1	NO	1		5		SATISFACTORY
0	1	1	1	1	NO	1		5		SATISFACTORY
0	1	1	1	1	NO	0		4		SATISFACTORY
1	1	1	0	1	NO	0		4		SATISFACTORY
0	1	1	1	1	NO	0		4		SATISFACTORY
0	1	1	0	1	NO	0		3		SATISFACTORY
0	1	1	1	1	NO	0		4		SATISFACTORY
0	1	1	0	1	NO	0		3		SATISFACTORY
1	1	1	1	1	NO	0		5		SATISFACTORY
1	1	0	0	0	NO	0		2		Unsatisfactory
0	1	0	1	0	NO	0		2		Unsatisfactory
0	1	0	0	0	NO	0		1		Unsatisfactory
0	1	0	1	0	YES	0		2		Unsatisfactory
0	1	0	0	0	YES	0		1		Unsatisfactory
0	1	0	1	0	YES	0		2		Unsatisfactory
1	1	0	1	0	YES	1		4		SATISFACTORY
1	1	0	0	0	YES	1		3		SATISFACTORY
1	1	1	1	0	YES	1		5		SATISFACTORY
1	1	1	1	0	YES	1		5		SATISFACTORY
1	1	1	0	1	YES	1		5		SATISFACTORY
1	1	1	0	1	YES	1		5		SATISFACTORY
1	1	1	1	1	YES	1		6		SATISFACTORY
1	1	0	1	1	YES	1		5		SATISFACTORY
1	1	0	1	1	YES	1		5		SATISFACTORY
1	1	1	1	1	YES	1		6		SATISFACTORY
1	1	1	1	1	YES	1		6		SATISFACTORY
1	1	0	1	1	YES	1		5		SATISFACTORY
1	1	1	1	1	YES	1		6		SATISFACTORY
1	1	1	1	1	YES	1		6		SATISFACTORY
1	1	0	1	0	YES	1		4		SATISFACTORY
1	1	0	0	0	YES	1		3		SATISFACTORY
1	1	0	0	0	YES	1		3		SATISFACTORY
1	1	0	0	0	YES	1		3		SATISFACTORY
1	1	1	0	0	YES	1		4		SATISFACTORY
1	1	1	0	0	YES	1		4		SATISFACTORY
1	1	1	0	0	YES	1		4		SATISFACTORY
1	1	1	0	0	YES	1		4		SATISFACTORY
1	1	1	0	0	YES	1		4		SATISFACTORY
1	1	1	0	0	YES	1		4		SATISFACTORY
1	1	1	0	0	YES	1		4		SATISFACTORY
1	1	1	0	0	YES	1		4		SATISFACTORY
1	1	1	0	0	YES	1		4		SATISFACTORY
1	1	1	0	0	YES	1		4		SATISFACTORY
1	1	1	0	0	YES	1		4		SATISFACTORY
1	1	0	0	1	YES	1		4		SATISFACTORY
1	1	0	1	1	YES	1		5		SATISFACTORY
1	1	1	0	1	YES	1		5		SATISFACTORY
1	1	1	0	1	YES	1		5		SATISFACTORY
1	1	0	0	1	YES	1		4		SATISFACTORY
1	1	1	0	1	YES	1		5		SATISFACTORY
1	1	1	0	1	YES	1		5		SATISFACTORY
1	1	1	0	1	NO	1		5		SATISFACTORY
1	1	1	0	1	NO	1		5		SATISFACTORY
1	1	1	0	1	NO	1		5		SATISFACTORY
1	1	1	0	1	NO	1		5		SATISFACTORY
1	1	1	0	0	NO	1		4		SATISFACTORY
1	1	0	0	0	NO	1		3		SATISFACTORY
1	1	0	0	0	NO	1		3		SATISFACTORY
1	1	0	0	0	NO	1		3		SATISFACTORY
1	1	0	0	0	NO	1		3		SATISFACTORY
1	1	0	0	0	NO	1		3		SATISFACTORY
1	1	0	0	0	NO	1		3		SATISFACTORY
1	1	0	0	0	NO	1		3		SATISFACTORY
1	1	0	0	0	NO	1		3		SATISFACTORY
1	1	0	0	0	NO	1		3		SATISFACTORY
1	1	0	0	0	NO	1		3		SATISFACTORY
1	1	0	0	0	NO	1		3		SATISFACTORY
1	1	0	0	0	YES	1		3		SATISFACTORY
1	1	0	0	0	YES	1		3		SATISFACTORY
1	1	0	0	0	YES	1		3		SATISFACTORY
1	1	0	0	0	YES	1		3		SATISFACTORY
1	1	0	1	0	YES	1		4		SATISFACTORY
1	1	0	1	0	YES	1		4		SATISFACTORY
1	1	0	1	0	YES	1		4		SATISFACTORY
1	1	0	1	0	YES	1		4		SATISFACTORY
1	1	0	0	0	YES	1		3		SATISFACTORY
1	1	0	0	0	YES	1		3		SATISFACTORY
1	1	0	0	0	YES	1		3		SATISFACTORY
1	1	0	0	0	YES	1		3		SATISFACTORY
1	1	0	0	0	YES	1		3		SATISFACTORY
1	1	0	0	0	YES	1		3		SATISFACTORY
1	1	0	0	0	YES	1		3		SATISFACTORY
1	1	0	0	0	YES	1		3		SATISFACTORY
1	1	0	0	0	YES	1		3		SATISFACTORY
1	1	0	0	0	YES	1		3		SATISFACTORY
1	1	0	0	0	YES	1		3		SATISFACTORY
								3.16

## Sheet: Attitude score
Do you believe there is excessive AM in poultry?	Do you stop Rx with AB upon improvmnt in r birds?	Do U purchase AB based on other peoples experience?	Do you purchase or Use AB from your personal previous experience?		Do you Observe AB withdrawal peroid?	Do you discard eggs during Withdrawal peroid			Attitude score		Attitude grade
NO	1	0	1		1	0			3		SATISFACTORY
1	0	0	1		0	0			1		Unsatisfactory
NO	1	0	1		1	0			3		SATISFACTORY
NO	1	1	0		1	0			3		SATISFACTORY
NO	1	1	1		1	0			4		SATISFACTORY
NO	0	1	0		1	0			2		Unsatisfactory
NO	0	1	1		1	0			3		SATISFACTORY
NO	1	1	1		1	0			4		SATISFACTORY
NO	0	1	1		1	0			3		SATISFACTORY
NO	1	0	1		1	0			3		SATISFACTORY
NO	0	0	0		0	0			0		Unsatisfactory
NO	1	0	1		1	0			3		SATISFACTORY
NO	1	0	0		1	0			2		Unsatisfactory
NO	0	1	1		1	0			3		SATISFACTORY
1	1	1	1		1	0			4		SATISFACTORY
1	0	1	1		1	0			3		SATISFACTORY
1	1	0	1		1	0			3		SATISFACTORY
1	0	1	1		1	0			3		SATISFACTORY
NO	1	1	1		1	0			4		SATISFACTORY
NO	1	1	1		1	0			4		SATISFACTORY
NO	0	1	0		1	0			2		Unsatisfactory
NO	1	0	0		1	0			2		Unsatisfactory
NO	1	1	0		1	0			3		SATISFACTORY
NO	1	1	0		1	0			3		SATISFACTORY
NO	1	1	0		1	0			3		SATISFACTORY
NO	1	1	1		0	0			3		SATISFACTORY
NO	1	1	0		1	0			3		SATISFACTORY
NO	1	1	0		1	0			3		SATISFACTORY
NO	1	1	1		0	0			3		SATISFACTORY
NO	1	1	1		1	0			4		SATISFACTORY
NO	1	1	0		1	0			3		SATISFACTORY
NO	1	1	1		1	0			4		SATISFACTORY
NO	1	1	1		1	0			4		SATISFACTORY
NO	0	1	1		1	0			3		SATISFACTORY
NO	1	1	1		1	0			4		SATISFACTORY
NO	1	1	1		1	0			4		SATISFACTORY
NO	1	1	1		1	0			4		SATISFACTORY
NO	1	0	1		1	0			3		SATISFACTORY
1	0	1	1		1	0			3		SATISFACTORY
1	1	1	0		1	0			3		SATISFACTORY
NO	1	1	0		0	0			2		Unsatisfactory
NO	0	1	0		1	0			2		Unsatisfactory
1	1	1	0		1	0			3		SATISFACTORY
1	1	0	0		1	0			2		Unsatisfactory
NO	0	1	0		1	0			2		Unsatisfactory
NO	1	1	0		1	0			3		SATISFACTORY
1	1	1	0		1	0			3		SATISFACTORY
NO	0	1	0		1	0			2		Unsatisfactory
1	1	1	0		0	0			2		Unsatisfactory
NO	1	1	0		1	0			3		SATISFACTORY
1	0	0	0		1	0			1		Unsatisfactory
NO	1	1	0		1	0			3		SATISFACTORY
1	0	1	1		1	0			3		SATISFACTORY
1	1	1	1		1	0			4		SATISFACTORY
NO	0	1	1		1	0			3		SATISFACTORY
1	1	1	1		1	0			4		SATISFACTORY
NO	0	1	1		1	0			3		SATISFACTORY
NO	1	1	1		1	0			4		SATISFACTORY
NO	0	1	1		0	0			2		Unsatisfactory
NO	1	1	1		1	0			4		SATISFACTORY
NO	0	1	1		0	0			2		Unsatisfactory
NO	0	1	1		1	0			3		SATISFACTORY
NO	1	1	1		1	0			4		SATISFACTORY
NO	1	0	0		1	0			2		Unsatisfactory
NO	0	0	0		1	0			1		Unsatisfactory
NO	0	1	0		1	0			2		Unsatisfactory
NO	1	1	0		1	0			3		SATISFACTORY
NO	1	1	0		1	0			3		SATISFACTORY
NO	0	0	0		1	0			1		Unsatisfactory
NO	0	1	0		1	0			2		Unsatisfactory
NO	1	1	0		1	0			3		SATISFACTORY
NO	1	1	0		1	0			3		SATISFACTORY
NO	1	1	0		1	0			3		SATISFACTORY
NO	0	0	0		1	0			1		Unsatisfactory
NO	0	0	0		1	0			1		Unsatisfactory
NO	0	0	0		1	0			1		Unsatisfactory
NO	1	1	0		1	0			3		SATISFACTORY
NO	1	1	0		1	0			3		SATISFACTORY
NO	1	1	0		1	0			3		SATISFACTORY
NO	0	0	0		1	0			1		Unsatisfactory
NO	0	0	0		0	0			0		Unsatisfactory
NO	0	0	1		1	0			2		Unsatisfactory
NO	1	0	1		1	0			3		SATISFACTORY
NO	1	0	1		1	0			3		SATISFACTORY
NO	1	1	1+W89		1	0			3		SATISFACTORY
NO	1	1	1		1	0			4		SATISFACTORY
NO	1	1	0		1	0			3		SATISFACTORY
NO	0	1	0		1	0			2		Unsatisfactory
NO	1	1	0		1	0			3		SATISFACTORY
NO	1	1	0		1	0			3		SATISFACTORY
NO	1	1	0		1	0			3		SATISFACTORY
NO	0	1	0		1	0			2		Unsatisfactory
NO	0	1	0		1	0			2		Unsatisfactory
NO	0	1	1		1	0			3		SATISFACTORY
NO	0	1	1		1	0			3		SATISFACTORY
NO	1	1	1		1	0			4		SATISFACTORY
NO	0	1	0		1	0			2		Unsatisfactory
NO	1	1	0		1	0			3		SATISFACTORY
NO	0	1	0		1	0			2		Unsatisfactory
NO	1	1	1		1	0			4		SATISFACTORY
NO	1	1	1		1	0			4		SATISFACTORY
NO	1	1	1		1	0			4		SATISFACTORY
NO	1	1	0		1	0			3		SATISFACTORY
NO	1	1	0		1	0			3		SATISFACTORY
NO	1	1	0		1	0			3		SATISFACTORY
NO	1	1	0		1	0			3		SATISFACTORY
NO	1	1	0		1	0			3		SATISFACTORY
NO	1	1	1		1	0			4		SATISFACTORY
NO	1	1	1		0	0			3		SATISFACTORY
NO	0	1	0		1	0			2		Unsatisfactory
NO	0	1	0		1	0			2		Unsatisfactory
NO	0	1	0		1	0			2		Unsatisfactory
NO	0	1	0		1	0			2		Unsatisfactory
NO	1	1	0		1	0			3		SATISFACTORY
NO	0	0	0		1	0			1		Unsatisfactory
NO	1	1	0		1	0			3		SATISFACTORY
NO	0	1	0		1	0			2		Unsatisfactory
NO	1	1	1		0	0			3		SATISFACTORY
NO	1	1	1		0	0			3		SATISFACTORY
NO	1	1	0		1	0			3		SATISFACTORY
NO	1	1	0		1	0			3		SATISFACTORY
NO	0	1	0		1	0			2		Unsatisfactory
NO	0	1	0		1	0			2		Unsatisfactory
NO	0	1	1		1	0			3		SATISFACTORY
NO	0	1	1		0	0			2		Unsatisfactory
									2.752

## Sheet: Perception score
AMR is nt a major pblm in Naija?	AB prescptn must be by a vet	Farmers must reduce AB use	Proper poultry vacc will reduce dependence on AB	Farmers needs hand washing to get rid of AMR pathogens	AB should only be prescrbd when needed	I am at risk of AMR pathgn infxn	There is nothing I can do to stop AMR spread			Perception score		Perception grade
1	1	1	0	1	1	1	0			6		Satisfactory
0	1	1	1	0	1	1	0			5		Unsatisfactory
0	1	1	1	1	1	1	0			6		Satisfactory
0	1	1	1	1	1	1	0			6		Satisfactory
0	0	1	0	1	1	1	0			4		Unsatisfactory
0	0	1	1	1	1	1	0			5		Unsatisfactory
0	0	1	0	1	1	1	0			4		Unsatisfactory
0	0	1	1	1	1	1	0			5		Unsatisfactory
0	0	1	0	1	1	1	0			4		Unsatisfactory
0	0	1	1	1	1	1	0			5		Unsatisfactory
1	1	1	0	1	1	1	0			6		Satisfactory
1	1	1	1	1	1	1	0			7		Satisfactory
1	1	1	0	1	1	1	0			6		Satisfactory
1	1	1	0	1	1	1	0			6		Satisfactory
1	1	1	0	1	1	1	0			6		Satisfactory
1	1	1	0	1	1	1	1			7		Satisfactory
1	0	1	0	1	1	1	1			6		Satisfactory
1	0	1	0	1	1	1	1			6		Satisfactory
1	0	1	0	1	1	1	1			6		Satisfactory
1	0	1	1	1	1	1	1			7		Satisfactory
1	0	0	1	1	1	1	1			6		Satisfactory
1	0	1	1	1	1	1	1			7		Satisfactory
1	0	1	1	1	1	1	1			7		Satisfactory
1	0	1	1	1	1	1	1			7		Satisfactory
1	1	0	1	1	1	1	1			7		Satisfactory
1	1	0	1	1	0	1	1			6		Satisfactory
1	1	0	1	1	0	1	1			6		Satisfactory
1	1	0	1	1	0	1	1			6		Satisfactory
1	1	0	1	1	0	1	1			6		Satisfactory
1	1	0	1	1	0	1	1			6		Satisfactory
1	1	0	1	1	0	1	1			6		Satisfactory
0	1	0	1	1	0	1	1			5		Unsatisfactory
0	1	1	1	0	0	1	1			5		Unsatisfactory
1	1	1	1	1	0	1	1			7		Satisfactory
1	1	1	1	1	0	1	1			7		Satisfactory
1	1	1	1	1	0	1	0			6		Satisfactory
1	1	1	1	1	1	1	0			7		Satisfactory
1	1	1	1	1	1	1	0			7		Satisfactory
1	1	1	1	1	1	1	0			7		Satisfactory
1	1	1	1	1	1	1	0			7		Satisfactory
1	1	1	1	1	1	1	0			7		Satisfactory
0	1	0	1	1	0	1	0			4		Unsatisfactory
0	0	0	1	1	0	1	1			4		Unsatisfactory
1	0	0	1	0	0	1	1			4		Unsatisfactory
1	0	0	1	1	0	1	1			5		Unsatisfactory
1	0	0	1	1	0	1	1			5		Unsatisfactory
1	0	0	1	1	0	1	1			5		Unsatisfactory
1	0	0	1	1	0	1	1			5		Unsatisfactory
1	0	0	1	1	0	1	1			5		Unsatisfactory
1	0	0	1	1	0	1	1			5		Unsatisfactory
1	0	0	1	1	0	1	1			5		Unsatisfactory
0	0	0	1	1	1	1	1			5		Unsatisfactory
0	0	0	1	1	0	1	1			4		Unsatisfactory
0	1	0	1	1	0	1	1			5		Unsatisfactory
1	1	0	1	1	0	1	1			6		Satisfactory
1	1	0	1	0	0	1	0			4		Unsatisfactory
1	1	0	1	0	0	1	0			4		Unsatisfactory
1	1	0	1	0	0	1	0			4		Unsatisfactory
1	1	0	1	0	0	1	0			4		Unsatisfactory
1	1	0	1	0	0	1	0			4		Unsatisfactory
1	1	0	1	0	0	1	1			5		Unsatisfactory
1	1	0	1	0	0	1	1			5		Unsatisfactory
1	1	0	1	0	0	1	1			5		Unsatisfactory
0	1	0	1	0	0	1	1			4		Unsatisfactory
0	1	0	1	0	0	1	0			3		Unsatisfactory
1	1	0	1	0	0	1	0			4		Unsatisfactory
1	1	0	1	0	0	1	1			5		Unsatisfactory
1	1	0	1	0	0	1	1			5		Unsatisfactory
1	1	0	1	0	1	1	1			6		Satisfactory
1	1	0	1	0	1	1	1			6		Satisfactory
1	0	0	1	0	1	1	1			5		Unsatisfactory
1	0	0	1	0	1	1	1			5		Unsatisfactory
1	0	0	0	0	1	1	1			4		Unsatisfactory
1	0	0	0	0	1	1	1			4		Unsatisfactory
1	0	0	0	0	1	1	1			4		Unsatisfactory
1	0	0	0	1	1	1	1			5		Unsatisfactory
1	0	0	0	1	1	1	1			5		Unsatisfactory
1	0	0	0	1	1	1	1			5		Unsatisfactory
1	0	0	0	1	1	1	1			5		Unsatisfactory
1	0	0	0	1	1	1	1			5		Unsatisfactory
1	1	0	0	1	1	1	1			6		Satisfactory
1	1	0	0	1	1	1	1			6		Satisfactory
1	1	0	0	1	1	1	1			6		Satisfactory
1	1	0	0	1	1	1	1			6		Satisfactory
1	1	0	0	1	1	1	1			6		Satisfactory
1	1	0	0	1	1	1	0			5		Unsatisfactory
1	1	0	0	1	1	1	0			5		Unsatisfactory
1	1	0	0	1	1	1	0			5		Unsatisfactory
1	1	0	0	1	1	1	0			5		Unsatisfactory
1	1	0	0	1	1	1	0			5		Unsatisfactory
1	0	0	0	1	1	1	0			4		Unsatisfactory
1	1	0	0	1	1	1	0			5		Unsatisfactory
1	0	0	0	1	1	1	0			4		Unsatisfactory
1	0	0	0	1	1	2	0			5		Unsatisfactory
1	1	0	0	1	1	2	0			6		Satisfactory
1	0	0	0	1	0	1	0			3		Unsatisfactory
1	0	0	0	1	1	1	0			4		Unsatisfactory
1	0	0	0	1	1	1	0			4		Unsatisfactory
1	0	0	0	1	0	1	0			3		Unsatisfactory
1	0	0	0	1	0	1	0			3		Unsatisfactory
1	0	0	0	1	0	1	0			3		Unsatisfactory
1	0	0	0	1	0	1	0			3		Unsatisfactory
1	0	0	0	1	0	1	0			3		Unsatisfactory
1	0	0	0	1	0	1	0			3		Unsatisfactory
1	0	0	0	1	0	1	0			3		Unsatisfactory
1	0	0	0	1	0	1	0			3		Unsatisfactory
1	0	0	0	1	0	1	0			3		Unsatisfactory
1	0	0	0	1	0	1	0			3		Unsatisfactory
1	0	0	0	1	0	1	0			3		Unsatisfactory
1	0	0	0	1	0	1	0			3		Unsatisfactory
1	0	0	0	1	0	1	0			3		Unsatisfactory
1	1	0	0	1	0	1	0			4		Unsatisfactory
1	0	0	0	1	0	1	0			3		Unsatisfactory
1	0	0	0	1	0	2	0			4		Unsatisfactory
1	0	0	0	1	0	2	0			4		Unsatisfactory
1	0	0	0	1	1	2	0			5		Unsatisfactory
1	0	0	0	1	1	2	0			5		Unsatisfactory
1	0	0	0	1	1	2	0			5		Unsatisfactory
1	0	0	0	1	1	1	0			4		Unsatisfactory
1	0	0	0	1	1	1	0			4		Unsatisfactory
1	0	0	0	1	1	1	0			4		Unsatisfactory
1	0	0	0	1	1	1	0			4		Unsatisfactory
1	0	0	0	1	1	1	0			4		Unsatisfactory
1	0	0	0	1	1	1	0			4		Unsatisfactory
1	1	0	0	1	1	1	0			5		Unsatisfactory
										4.944

## Sheet: Age range
AGE	Category		20	21-29
21	21-29		30	31-39
32	31-39		40	40-49
21	21-29		50	50-59
35	31-39		60	60-69
24	21-29		70	70-79
36	31-39		80	80-89
26	21-29		20	21-29
27	21-29		30	31-39
24	21-29		40	40-49
37	31-39		50	50-59
35	31-39		60	60-69
28	21-29		70	70-79
26	21-29		80	80-89
29	21-29		20	21-29
25	21-29		30	31-39
26	21-29		40	40-49
20	21-29		50	50-59
27	21-29		60	60-69
30	31-39		70	70-79
35	31-39		80	80-89
26	21-29		20	21-29
27	21-29		30	31-39
27	21-29		40	40-49
29	21-29		50	50-59
30	31-39		60	60-69
31	31-39		70	70-79
35	31-39		80	80-89
36	31-39
34	31-39
39	31-39
36	31-39
34	31-39
34	31-39
21	21-29
29	21-29
26	21-29
26	21-29
24	21-29
32	31-39
20	21-29
34	31-39
24	21-29
25	21-29
24	21-29
41	41-49
49	40-49
56	50-59
57	50-59
51	50-59
58	50-59
51	50-59
46	40-49
49	40-49
48	40-49
49	40-49
42	40-49
57	50-59
54	50-59
56	50-59
54	50-59
46	40-49
46	40-49
45	40-49
48	40-49
46	40-49
54	50-59
58	50-59
49	40-49
42	40-49
49	40-49
40	40-49
40	40-49
40	40-49
54	50-59
52	50-59
51	50-59
58	50-59
53	50-59
59	50-59
57	50-59
52	50-59
58	50-59
52	50-59
52	50-59
42	40-49
40	40-49
46	40-49
41	40-49
48	40-49
42	40-49
48	40-49
42	40-49
43	40-49
47	40-49
49	40-49
45	40-49
54	50-59
59	50-59
56	50-59
54	50-59
45	40-49
51	50-59
52	50-59
54	50-59
45	40-49
40	40-49
40	40-49
41	40-49
47	40-49
43	40-49
47	40-49
43	40-49
60	60-69
65	60-69
64	60-69
61	60-69
62	60-69
62	60-69
64	60-69
63	60-69
68	60-69
62	60-69
60	60-69
61	60-69
61	60-69
